# Supplementary material for: PEG-Induced Osmotic Stress Alters Root Morphology and Root Hair Traits in Wheat Genotypes
Source: MDPI journal article supplement (doi:10.3390/plants10061042), 2021-05-21
Supplement: s1 [file s1]

### Supplementary Data

**Table S1:** Comparison of means among wheat varieties. PH=Plant height (cm), TLL=Total no. of live leaves, ChlC= Chlorophyll content (SPAD value), LS4= **Leaf injury scores at 4<sup>th</sup> leaf**, LS5= Leaf injury scores at 5<sup>th</sup> leaf, SDW=Shoot dry weight (g), RDW=Root dry weight (g), TPr=Total number of phytomers per tiller, TR=Total no. of roots per tiller, NSR=No. of seminal roots, LSR=Length of seminal roots (cm), MAL=Main axis length at Pr4 (cm), MALPr1=Main root axis length at phytomer 1 (cm), MAD=Main axis diameter (mm), PAL=Length of first order lateral roots (cm), PAD=Diameter of first order lateral roots (mm), DPA=Density of first order lateral roots (no. mm<sup>-1</sup>), **SAL=Length of second order lateral roots** (cm), SAD=Diameter of second order lateral roots (mm), DSA=Density of second order lateral roots (no. mm<sup>-1</sup>), DRH<sub>MA</sub>= Density of root hairs of main axis, DRH<sub>SA</sub>= Density of root hairs of second order lateral roots (no. mm<sup>-1</sup>), DRH<sub>PA</sub>=Density of root hairs of first order lateral roots (no. mm<sup>-1</sup>), RHL<sub>PA</sub>=Length of root hairs of first order lateral roots (μm).

| VARIETY        | PH               | TLL          | Chl3             | LS4              | LS5              | SDW              | RDW              | TPr          | TR               | NSR          | LSR              | MALPr4       |
|----------------|------------------|--------------|------------------|------------------|------------------|------------------|------------------|--------------|------------------|--------------|------------------|--------------|
| Durum          | 40.33            | 5.00         | 31.25            | 3.00             | 4.33             | 0.35             | 0.06             | 6.50         | 9.00             | 4.50         | 2.36             | 49.00        |
| Sourav         | 37.33            | 4.33         | 28.37            | 2.67             | 4.33             | 0.40             | 0.06             | 7.00         | 9.25             | 5.00         | 1.38             | 46.05        |
| Gourab         | 41.35            | 4.00         | 27.23            | 3.33             | 6.00             | 0.35             | 0.05             | 6.75         | 8.75             | 5.50         | 2.30             | 55.88        |
| Sonalika       | 40.45            | 4.17         | 29.22            | 4.33             | 6.33             | 0.39             | 0.06             | 7.00         | 7.50             | 4.50         | 2.68             | 46.68        |
| Kanchan        | 34.08            | 4.33         | 28.85            | 3.33             | 4.33             | 0.33             | 0.04             | 6.00         | 7.50             | 5.50         | 2.40             | 53.25        |
| Sonora-64      | 32.75            | 3.50         | 26.65            | 3.67             | 5.33             | 0.21             | 0.03             | 5.50         | 6.50             | 5.00         | 2.38             | 47.75        |
| Kalaysona      | 32.00            | 3.83         | 25.50            | 6.67             | 8.67             | 0.40             | 0.03             | 5.50         | 5.00             | 6.25         | 1.78             | 48.50        |
| Triticale      | 49.67            | 4.83         | 36.10            | 3.33             | 6.33             | 0.41             | 0.05             | 6.00         | 6.25             | 4.00         | 1.95             | 49.38        |
| Kheri          | 46.00            | 3.67         | 27.03            | 5.00             | 6.67             | 0.34             | 0.03             | 6.25         | 7.00             | 5.25         | 4.15             | 42.63        |
| BARI-21        | 38.42            | 4.33         | 25.03            | 3.33             | 4.33             | 0.44             | 0.06             | 6.50         | 8.25             | 4.50         | 2.30             | 55.13        |
| BARI-22        | 49.83            | 4.83         | 28.82            | 5.00             | 6.33             | 0.56             | 0.07             | 7.00         | 8.00             | 4.75         | 3.28             | 56.38        |
| BARI-23        | 37.37            | 4.33         | 25.90            | 5.00             | 7.00             | 0.37             | 0.06             | 6.25         | 9.50             | 5.00         | 3.06             | 44.50        |
| BARI-24        | 43.17            | 4.17         | 30.48            | 4.33             | 5.67             | 0.43             | 0.10             | 7.75         | 12.25            | 5.75         | 1.94             | 58.85        |
| BARI-25        | 35.55            | 4.33         | 28.82            | 5.00             | 6.00             | 0.35             | 0.09             | 7.00         | 9.00             | 6.25         | 3.50             | 59.75        |
| BARI-26        | 37.17            | 3.83         | 28.32            | 4.00             | 5.67             | 0.29             | 0.03             | 5.75         | 8.75             | 4.25         | 4.01             | 47.63        |
| BARI-27        | 35.83            | 4.00         | 28.87            | 4.67             | 6.67             | 0.25             | 0.08             | 5.50         | 5.75             | 5.25         | 3.21             | 44.85        |
| BARI-28        | 40.17            | 4.67         | 30.30            | 3.67             | 6.00             | 0.38             | 0.06             | 6.50         | 7.75             | 6.00         | 4.06             | 56.80        |
| BARI-29        | 42.33            | 4.67         | 31.72            | 4.33             | 6.00             | 0.48             | 0.07             | 6.50         | 7.00             | 4.25         | 2.87             | 47.88        |
| BARI-30        | 37.67            | 4.50         | 26.45            | 4.00             | 6.00             | 0.44             | 0.08             | 6.50         | 10.75            | 4.75         | 4.70             | 47.38        |
| BARI-31        | 37.50            | 4.00         | 28.58            | 4.67             | 7.00             | 0.34             | 0.05             | 6.50         | 9.50             | 5.25         | 2.36             | 46.25        |
| BARI-32        | 39.17            | 5.00         | 30.80            | 4.33             | 5.67             | 0.50             | 0.07             | 6.75         | 11.00            | 5.00         | 3.60             | 53.55        |
| BARI-33        | 43.00            | 4.67         | 28.95            | 4.33             | 7.33             | 0.56             | 0.07             | 6.75         | 9.00             | 4.25         | 3.28             | 50.60        |
| <b>Mean</b>    | <b>39.60</b>     | <b>4.32</b>  | <b>28.78</b>     | <b>4.18</b>      | <b>6.00</b>      | <b>0.39</b>      | <b>0.06</b>      | <b>6.44</b>  | <b>8.33</b>      | <b>5.03</b>  | <b>2.89</b>      | <b>50.39</b> |
| <b>SEM</b>     | <b>0.592</b>     | <b>0.075</b> | <b>0.283</b>     | <b>0.125</b>     | <b>0.159</b>     | <b>0.014</b>     | <b>0.008</b>     | <b>0.135</b> | <b>0.325</b>     | <b>0.148</b> | <b>0.189</b>     | <b>0.935</b> |
| <b>p value</b> | <b>&lt;0.001</b> | <b>0.002</b> | <b>&lt;0.001</b> | <b>&lt;0.001</b> | <b>&lt;0.001</b> | <b>&lt;0.001</b> | <b>&lt;0.001</b> | <b>0.115</b> | <b>&lt;0.001</b> | <b>0.003</b> | <b>&lt;0.001</b> | <b>0.005</b> |

**Table S1:** Comparison of means among wheat varieties (Cont.)

| VARIETY        | MALP1        | MAD              | PAL              | PAD              | DPA              | SAL              | SAD              | DSA              | DRH <sub>MA</sub> | DRH <sub>SA</sub> | DRH <sub>PA</sub> | RHL <sub>PA</sub> |
|----------------|--------------|------------------|------------------|------------------|------------------|------------------|------------------|------------------|-------------------|-------------------|-------------------|-------------------|
| Durum          | 2.30         | 0.46             | 2.70             | 0.23             | 5.10             | 0.35             | 0.14             | 3.30             | 8.20              | 7.10              | 7.60              | 343.00            |
| Sourav         | 2.63         | 0.37             | 2.99             | 0.22             | 5.80             | 0.46             | 0.15             | 3.90             | 6.00              | 8.50              | 8.30              | 579.00            |
| Gourab         | 2.00         | 0.44             | 1.78             | 0.21             | 6.75             | 0.52             | 0.18             | 4.20             | 7.60              | 9.10              | 7.00              | 440.00            |
| Sonalika       | 2.23         | 0.40             | 1.86             | 0.23             | 5.30             | 0.64             | 0.15             | 4.50             | 7.30              | 7.30              | 6.80              | 288.00            |
| Kanchan        | 2.20         | 0.38             | 3.52             | 0.21             | 5.90             | 0.58             | 0.14             | 4.15             | 7.70              | 7.40              | 9.30              | 432.00            |
| Sonora-64      | 1.78         | 0.39             | 1.64             | 0.25             | 5.90             | 0.54             | 0.15             | 4.50             | 6.90              | 8.00              | 7.70              | 548.00            |
| Kalaysona      | 1.58         | 0.49             | 1.65             | 0.23             | 5.46             | 0.29             | 0.13             | 3.00             | 6.50              | 5.67              | 9.10              | 346.00            |
| Triticale      | 2.10         | 0.51             | 2.06             | 0.24             | 5.65             | 0.52             | 0.14             | 3.60             | 6.70              | 4.73              | 5.80              | 376.00            |
| Kheri          | 2.48         | 0.40             | 1.87             | 0.22             | 6.25             | 0.37             | 0.16             | 3.80             | 8.80              | 9.60              | 7.80              | 477.00            |
| BARI-21        | 2.35         | 0.41             | 1.92             | 0.17             | 5.75             | 0.48             | 0.15             | 3.45             | 8.90              | 6.50              | 7.80              | 426.00            |
| BARI-22        | 2.18         | 0.41             | 2.31             | 0.21             | 5.85             | 0.43             | 0.15             | 3.95             | 6.00              | 7.10              | 9.70              | 505.00            |
| BARI-23        | 1.30         | 0.46             | 2.85             | 0.28             | 5.45             | 0.44             | 0.15             | 3.30             | 9.00              | 7.00              | 9.30              | 508.00            |
| BARI-24        | 3.05         | 0.49             | 2.52             | 0.25             | 5.40             | 0.44             | 0.17             | 4.35             | 7.10              | 7.80              | 8.10              | 625.00            |
| BARI-25        | 2.35         | 0.43             | 2.73             | 0.22             | 5.45             | 0.61             | 0.15             | 5.10             | 10.90             | 9.40              | 9.90              | 518.00            |
| BARI-26        | 2.13         | 0.36             | 2.37             | 0.20             | 5.50             | 0.37             | 0.15             | 4.50             | 6.80              | 8.90              | 8.00              | 415.00            |
| BARI-27        | 1.35         | 0.42             | 2.92             | 0.20             | 6.18             | 0.58             | 0.14             | 4.91             | 5.88              | 7.70              | 5.90              | 300.00            |
| BARI-28        | 2.50         | 0.41             | 2.05             | 0.26             | 5.90             | 0.37             | 0.15             | 5.85             | 8.60              | 7.90              | 9.50              | 461.00            |
| BARI-29        | 2.35         | 0.50             | 1.70             | 0.26             | 6.25             | 0.42             | 0.15             | 5.85             | 5.38              | 7.40              | 7.40              | 443.00            |
| BARI-30        | 2.83         | 0.50             | 1.75             | 0.22             | 6.05             | 0.41             | 0.16             | 4.05             | 6.60              | 8.40              | 7.50              | 439.00            |
| BARI-31        | 1.98         | 0.39             | 2.85             | 0.26             | 5.68             | 0.83             | 0.16             | 5.30             | 6.70              | 6.90              | 7.90              | 481.00            |
| BARI-32        | 2.38         | 0.42             | 1.40             | 0.20             | 5.88             | 0.38             | 0.16             | 3.40             | 6.40              | 7.50              | 10.80             | 588.00            |
| BARI-33        | 2.33         | 0.45             | 1.96             | 0.19             | 5.55             | 0.50             | 0.12             | 4.40             | 8.40              | 6.30              | 7.10              | 627.00            |
| <b>Mean</b>    | <b>2.20</b>  | <b>0.43</b>      | <b>2.24</b>      | <b>0.23</b>      | <b>5.77</b>      | <b>0.48</b>      | <b>0.15</b>      | <b>4.24</b>      | <b>7.38</b>       | <b>7.55</b>       | <b>8.10</b>       | <b>462.05</b>     |
| <b>SEM</b>     | <b>0.096</b> | <b>0.007</b>     | <b>0.273</b>     | <b>0.0036</b>    | <b>0.07</b>      | <b>0.019</b>     | <b>0.0014</b>    | <b>0.078</b>     | <b>0.166</b>      | <b>0.156</b>      | <b>0.157</b>      | <b>10.76</b>      |
| <b>p value</b> | <b>0.003</b> | <b>&lt;0.001</b>  | <b>&lt;0.001</b>  | <b>&lt;0.001</b>  | <b>&lt;0.001</b>  |

**Table S2:** Treatment  $\times$  Variety interactions in shoot, root and root hair traits of 22 wheat variety under two treatments. PH=Plant height, TLL=Total no. of live leaves, LS4= Leaf injury scores at 4<sup>th</sup> leaves, LS5= Leaf injury scores at 5<sup>th</sup> leaves, ChlC= Chlorophyll content, SDW=Shoot dry weight, TPr=Total number of root bearing phytomers per tiller, NSR=Number of seminal roots, LSR=Length of seminal roots, MALPr1-Pr4= Main axis length at phytomers 1-4.

| VARIETY   | PH    |              | TLL   |             | Chl3  |              | LS4         |         | LS5         |         | SDW   |             | TPr   |            | NSR   |            |
|-----------|-------|--------------|-------|-------------|-------|--------------|-------------|---------|-------------|---------|-------|-------------|-------|------------|-------|------------|
|           | 0%    | 10% PEG      | 0%    | 10% PEG     | 0%    | 10% PEG      | 0%          | 10% PEG | 0%          | 10% PEG | 0%    | 10% PEG     | 0%    | 10% PEG    | 0%    | 10% PEG    |
| Durum     | 43.00 | 37.67        | 5.67  | 4.33        | 35.10 | 27.40        | 2.33        | 3.67    | 3.67        | 5.00    | 0.41  | 0.29        | 7.0   | 6.0        | 4.5   | 4.5        |
| Sourav    | 41.00 | 33.67        | 4.33  | 4.33        | 28.37 | 28.37        | <b>2.33</b> | 3.00    | <b>3.00</b> | 5.67    | 0.49  | 0.31        | 7.5   | 6.5        | 5.5   | 4.5        |
| Gourab    | 44.37 | 38.33        | 4.67  | 3.33        | 28.37 | 26.10        | 3.00        | 3.67    | 4.33        | 7.67    | 0.41  | 0.28        | 7.5   | 6.0        | 6.5   | 4.5        |
| Sonalika  | 44.23 | 36.67        | 4.00  | 4.33        | 29.83 | 28.60        | 3.67        | 5.00    | 5.67        | 7.00    | 0.51  | 0.26        | 7.0   | 7.0        | 5.5   | 3.5        |
| Kanchan   | 42.50 | <b>25.67</b> | 4.67  | 4.00        | 30.63 | 27.07        | 3.00        | 3.67    | 3.67        | 5.00    | 0.42  | 0.23        | 6.0   | 6.0        | 6.5   | 4.5        |
| Sonora-64 | 34.50 | 31.00        | 3.67  | 3.33        | 31.60 | <b>21.70</b> | 3.00        | 4.33    | 4.33        | 6.33    | 0.25  | <b>0.17</b> | 6.5   | 4.5        | 4.5   | 5.5        |
| Kalaysona | 35.33 | 28.67        | 4.00  | 3.67        | 28.10 | 22.90        | 4.33        | 9.00    | 8.33        | 9.00    | 0.60  | 0.21        | 7.0   | 4.0        | 6.0   | 6.5        |
| Triticale | 53.33 | 46.00        | 5.33  | 4.33        | 36.27 | 35.93        | 3.00        | 3.67    | 5.00        | 7.67    | 0.42  | 0.41        | 7.0   | 5.0        | 4.5   | 3.5        |
| Kheri     | 43.00 | 49.00        | 4.00  | 3.33        | 26.20 | 27.87        | 4.33        | 5.67    | 6.33        | 7.00    | 0.38  | 0.30        | 6.5   | 6.0        | 5.0   | 5.5        |
| BARI-21   | 44.17 | 32.67        | 4.67  | 4.00        | 26.37 | 23.70        | 3.67        | 3.00    | 5.00        | 3.67    | 0.56  | 0.32        | 7.0   | 6.0        | 5.5   | 3.5        |
| BARI-22   | 52.67 | 47.00        | 5.67  | 4.00        | 27.83 | 29.80        | 5.00        | 5.00    | 5.00        | 7.67    | 0.68  | 0.45        | 7.5   | 6.5        | 5.5   | 4.0        |
| BARI-23   | 41.73 | 33.00        | 5.00  | 3.67        | 28.57 | 23.23        | 3.67        | 6.33    | 5.00        | 9.00    | 0.46  | 0.28        | 7.5   | 5.0        | 7.0   | 3.0        |
| BARI-24   | 44.33 | 42.00        | 5.00  | <b>3.33</b> | 31.33 | 29.63        | 3.67        | 5.00    | 5.67        | 5.67    | 0.47  | 0.39        | 10.0  | 5.5        | 7.0   | 4.5        |
| BARI-25   | 38.77 | 32.33        | 4.67  | 4.00        | 30.27 | 27.37        | 5.00        | 5.00    | 5.00        | 7.00    | 0.42  | 0.28        | 8.5   | 5.5        | 7.0   | 5.5        |
| BARI-26   | 36.00 | 38.33        | 4.00  | 3.67        | 27.80 | 28.83        | 4.33        | 3.67    | 5.67        | 5.67    | 0.23  | 0.35        | 6.0   | 5.5        | 4.5   | 4.0        |
| BARI-27   | 38.33 | 33.33        | 4.33  | 3.67        | 28.13 | 29.60        | 3.67        | 5.67    | 5.00        | 8.33    | 0.26  | 0.25        | 7.0   | <b>4.0</b> | 6.5   | 4.0        |
| BARI-28   | 45.33 | 35.00        | 5.00  | 4.33        | 29.73 | 30.87        | 3.00        | 4.33    | 5.00        | 7.00    | 0.53  | 0.24        | 7.5   | 5.5        | 5.5   | 6.5        |
| BARI-29   | 46.00 | 38.67        | 5.33  | 4.00        | 33.07 | 30.37        | 3.00        | 5.67    | 4.33        | 7.67    | 0.56  | 0.40        | 6.5   | 6.5        | 5.5   | <b>3.0</b> |
| BARI-30   | 36.33 | 39.00        | 5.00  | 4.00        | 25.23 | 27.67        | 3.67        | 4.33    | 5.00        | 7.00    | 0.47  | 0.40        | 7.0   | 6.0        | 4.5   | 5.0        |
| BARI-31   | 39.67 | 35.33        | 4.33  | 3.67        | 30.33 | 26.83        | 5.00        | 4.33    | 5.67        | 8.33    | 0.38  | 0.29        | 6.5   | 6.5        | 6.0   | 4.5        |
| BARI-32   | 43.00 | 35.33        | 5.67  | 4.33        | 32.90 | 28.70        | 3.67        | 5.00    | 4.33        | 7.00    | 0.58  | 0.42        | 8.0   | 5.5        | 5.5   | 4.5        |
| BARI-33   | 46.33 | 39.67        | 5.67  | 3.67        | 29.70 | 28.20        | 4.33        | 4.33    | 6.33        | 8.33    | 0.62  | 0.51        | 7.0   | 6.5        | 4.5   | 4.0        |
| Mean      | 42.5  | 36.7         | 4.76  | 3.88        | 29.8  | 27.7         | 3.67        | 4.70    | 5.06        | 6.94    | 0.46  | 0.32        | 7.18  | 5.70       | 5.59  | 4.48       |
| SEM       | 0.73  | 0.79         | 0.10  | 0.08        | 0.41  | 0.37         | 0.13        | 0.19    | 0.19        | 0.19    | 0.02  | 0.02        | 0.16  | 0.16       | 0.21  | 0.20       |
| p value   | 0.002 |              | 0.307 |             | 0.057 |              | 0.003       |         | 0.03        |         | 0.027 |             | 0.044 |            | 0.003 |            |

**Table S2:** Treatment × Variety interactions in shoot, root and root hair traits of 22 wheat variety under two treatments (cont.)

| VARIETY        | LSR   |             | MALPr1 |         | MALPr2 |         | MALPr3 |         | MALPr4 |         |
|----------------|-------|-------------|--------|---------|--------|---------|--------|---------|--------|---------|
|                | 0%    | 10% PEG     | 0%     | 10% PEG | 0%     | 10% PEG | 0%     | 10% PEG | 0%     | 10% PEG |
| Durum          | 2.3   | 2.44        | 1.80   | 3.30    | 5.85   | 21.55   | 10.85  | 24.30   | 21.45  | 31.00   |
| Sourav         | 1.4   | <b>1.32</b> | 3.35   | 1.90    | 4.90   | 3.85    | 5.70   | 13.45   | 31.00  | 22.35   |
| Gourab         | 1.9   | 2.72        | 2.15   | 3.50    | 4.90   | 5.30    | 9.50   | 19.70   | 15.60  | 26.50   |
| Sonalika       | 1.8   | 3.53        | 2.20   | 2.75    | 7.90   | 6.45    | 10.15  | 17.40   | 16.05  | 32.15   |
| Kanchan        | 1.6   | 3.20        | 2.55   | 1.85    | 7.15   | 18.50   | 17.30  | 30.00   | 44.25  | 38.85   |
| Sonora-64      | 2.3   | 2.47        | 2.35   | 1.10    | 3.70   | 17.50   | 13.60  | 21.25   | 25.05  | 41.50   |
| Kalaysona      | 2.0   | 1.55        | 1.50   | 1.65    | 3.15   | 11.50   | 29.00  | 13.00   | 43.00  | 49.00   |
| Triticale      | 1.8   | 2.14        | 2.85   | 1.85    | 10.65  | 3.80    | 15.40  | 24.20   | 18.60  | 32.25   |
| Kheri          | 3.1   | 5.16        | 3.10   | 2.35    | 14.25  | 9.30    | 19.60  | 12.70   | 26.50  | 26.50   |
| BARI-21        | 2.6   | 2.02        | 2.90   | 1.80    | 6.30   | 19.50   | 18.00  | 32.00   | 27.25  | 35.75   |
| BARI-22        | 2.2   | 4.36        | 2.85   | 2.00    | 15.50  | 21.20   | 16.05  | 28.75   | 23.50  | 33.00   |
| BARI-23        | 1.5   | 4.64        | 2.45   | 1.15    | 9.35   | 4.30    | 14.75  | 10.90   | 18.75  | 17.30   |
| BARI-24        | 2.1   | 1.79        | 4.25   | 2.75    | 7.40   | 4.80    | 11.60  | 10.05   | 18.00  | 22.25   |
| BARI-25        | 2.9   | 4.07        | 3.35   | 1.35    | 7.95   | 22.05   | 8.85   | 14.90   | 12.20  | 40.75   |
| BARI-26        | 2.8   | 5.18        | 2.25   | 2.00    | 3.85   | 5.35    | 7.45   | 21.25   | 27.00  | 32.00   |
| BARI-27        | 4.9   | 1.55        | 0.95   | 1.50    | 2.90   | 11.00   | 4.90   | 20.00   | 9.70   | 33.00   |
| BARI-28        | 3.5   | 4.60        | 2.25   | 2.75    | 3.70   | 19.00   | 12.95  | 22.50   | 20.05  | 57.50   |
| BARI-29        | 3.1   | 2.62        | 2.40   | 2.80    | 19.25  | 26.75   | 33.00  | 36.00   | 35.50  | 45.75   |
| BARI-30        | 4.3   | 5.07        | 3.70   | 1.95    | 12.80  | 5.35    | 25.50  | 10.55   | 28.00  | 32.35   |
| BARI-31        | 2.4   | 2.36        | 1.60   | 2.35    | 3.25   | 3.45    | 5.75   | 13.50   | 23.50  | 37.50   |
| BARI-32        | 2.5   | 4.76        | 3.85   | 1.90    | 6.70   | 3.25    | 12.80  | 5.60    | 19.75  | 19.60   |
| BARI-33        | 3.0   | 3.53        | 2.50   | 2.15    | 6.55   | 7.75    | 23.50  | 13.00   | 25.50  | 26.25   |
| <b>Mean</b>    | 2.55  | 3.23        | 2.60   | 2.12    | 7.63   | 11.43   | 14.83  | 18.86   | 24.10  | 33.32   |
| <b>SEM</b>     | 0.205 | 0.325       | 0.10   | 1.25    | 0.85   | 1.47    | 1.01   | 1.50    | 1.41   | 2.04    |
| <b>p value</b> | 0.01  |             | 0.003  |         | 0.001  |         | 0.019  |         | 0.002  |         |

**Table S3:** Correlation coefficients of root traits. PH=Plant height, TLL=Total no. of live leaves, LS4= Leaf injury scores at 4<sup>th</sup> leaves, LS5= Leaf injury scores at 5<sup>th</sup> leaves, ChlC= Chlorophyll content, SDW=Shoot dry weight, RDW=Root dry weight, TPr=Total number

of root bearing phytomers per tiller, TR=Total number of roots per tiller, NSR=Number of seminal roots, LSR=Length of seminal roots, MALmax= Maximum main axis length, MAD=Main axis diameter, PAL=Length of first order lateral roots, PAD=Diameter of first order lateral roots, DPA=Density of first order lateral roots, SAL=Length of second order lateral roots, SAD=Diameter of second order lateral roots, DSA=Density of second order lateral roots, DRH<sub>MA</sub>= Density of root hairs of main axis, DRH<sub>SA</sub>= Density of root hairs of second order lateral roots.

|        | RDW                  | TPr                  | TR                   | NSR                  | LSR                  | MALmax               | MAD                 | PAL                  | PAD                 | DPA                  | SAL                 | SAD                  | DSA                 | DRHma               | DRHsa               |
|--------|----------------------|----------------------|----------------------|----------------------|----------------------|----------------------|---------------------|----------------------|---------------------|----------------------|---------------------|----------------------|---------------------|---------------------|---------------------|
| TPr    | 0.379 <sup>NS</sup>  |                      |                      |                      |                      |                      |                     |                      |                     |                      |                     |                      |                     |                     |                     |
| TR     | 0.492 <sup>NS</sup>  | 0.92***              |                      |                      |                      |                      |                     |                      |                     |                      |                     |                      |                     |                     |                     |
| NSR    | 0.405 <sup>NS</sup>  | 0.754**              | 0.867***             |                      |                      |                      |                     |                      |                     |                      |                     |                      |                     |                     |                     |
| LSR    | -0.039 <sup>NS</sup> | -0.012 <sup>NS</sup> | -0.12 <sup>NS</sup>  | -0.01 <sup>NS</sup>  |                      |                      |                     |                      |                     |                      |                     |                      |                     |                     |                     |
| MALmax | 0.664*               | -0.101 <sup>NS</sup> | 0.091 <sup>NS</sup>  | 0.008 <sup>NS</sup>  | -0.278 <sup>NS</sup> |                      |                     |                      |                     |                      |                     |                      |                     |                     |                     |
| MAD    | 0.34 <sup>NS</sup>   | -0.383 <sup>NS</sup> | -0.358 <sup>NS</sup> | -0.369 <sup>NS</sup> | 0.011 <sup>NS</sup>  | 0.252 <sup>NS</sup>  |                     |                      |                     |                      |                     |                      |                     |                     |                     |
| PAL    | 0.481 <sup>NS</sup>  | -0.381 <sup>NS</sup> | -0.149 <sup>NS</sup> | -0.034 <sup>NS</sup> | 0.221 <sup>NS</sup>  | 0.606*               | 0.585*              |                      |                     |                      |                     |                      |                     |                     |                     |
| PAD    | 0.073 <sup>NS</sup>  | -0.612*              | -0.528 <sup>NS</sup> | -0.461 <sup>NS</sup> | -0.042 <sup>NS</sup> | 0.206 <sup>NS</sup>  | 0.719**             | 0.525 <sup>NS</sup>  |                     |                      |                     |                      |                     |                     |                     |
| DPA    | -0.145 <sup>NS</sup> | -0.759**             | -0.634*              | -0.348 <sup>NS</sup> | 0.341 <sup>NS</sup>  | -0.051 <sup>NS</sup> | 0.381 <sup>NS</sup> | 0.545 <sup>NS</sup>  | 0.521 <sup>NS</sup> |                      |                     |                      |                     |                     |                     |
| SAL    | 0.162 <sup>NS</sup>  | -0.067 <sup>NS</sup> | -0.068 <sup>NS</sup> | -0.316 <sup>NS</sup> | 0.42 <sup>NS</sup>   | -0.002 <sup>NS</sup> | 0.097 <sup>NS</sup> | 0.217 <sup>NS</sup>  | 0.088 <sup>NS</sup> | 0.303 <sup>NS</sup>  |                     |                      |                     |                     |                     |
| SAD    | 0.257 <sup>NS</sup>  | 0.309 <sup>NS</sup>  | 0.266 <sup>NS</sup>  | 0.169 <sup>NS</sup>  | -0.019 <sup>NS</sup> | 0.144 <sup>NS</sup>  | -0.09 <sup>NS</sup> | -0.134 <sup>NS</sup> | 0.232 <sup>NS</sup> | -0.176 <sup>NS</sup> | 0.19 <sup>NS</sup>  |                      |                     |                     |                     |
| DSA    | 0.448 <sup>NS</sup>  | -0.337 <sup>NS</sup> | -0.262 <sup>NS</sup> | -0.347 <sup>NS</sup> | 0.38 <sup>NS</sup>   | 0.378 <sup>NS</sup>  | 0.546 <sup>NS</sup> | 0.588*               | 0.677*              | 0.373 <sup>NS</sup>  | 0.508 <sup>NS</sup> | 0.251 <sup>NS</sup>  |                     |                     |                     |
| DRHma  | 0.392 <sup>NS</sup>  | -0.032 <sup>NS</sup> | -0.113 <sup>NS</sup> | -0.008 <sup>NS</sup> | 0.748**              | 0.01 <sup>NS</sup>   | 0.389 <sup>NS</sup> | 0.497 <sup>NS</sup>  | 0.285 <sup>NS</sup> | 0.321 <sup>NS</sup>  | 0.341 <sup>NS</sup> | -0.027 <sup>NS</sup> | 0.638*              |                     |                     |
| DRHsa  | 0.205 <sup>NS</sup>  | -0.186 <sup>NS</sup> | -0.125 <sup>NS</sup> | 0.005 <sup>NS</sup>  | 0.416 <sup>NS</sup>  | 0.503 <sup>NS</sup>  | 0.084 <sup>NS</sup> | 0.533 <sup>NS</sup>  | 0.313 <sup>NS</sup> | 0.205 <sup>NS</sup>  | 0.001 <sup>NS</sup> | 0.26 <sup>NS</sup>   | 0.442 <sup>NS</sup> | 0.392 <sup>NS</sup> |                     |
| DRHpa  | 0.334 <sup>NS</sup>  | -0.374 <sup>NS</sup> | -0.447 <sup>NS</sup> | -0.349 <sup>NS</sup> | 0.203 <sup>NS</sup>  | 0.236 <sup>NS</sup>  | 0.691*              | 0.579*               | 0.591*              | 0.473 <sup>NS</sup>  | 0.238 <sup>NS</sup> | -0.01 <sup>NS</sup>  | 0.488 <sup>NS</sup> | 0.658*              | 0.297 <sup>NS</sup> |

\*, \*\*, and \*\*\* = Significant at  $\leq 5\%$ ,  $\leq 1\%$ , and  $\leq 0.1\%$  levels of probability, respectively and NS= Non-significant

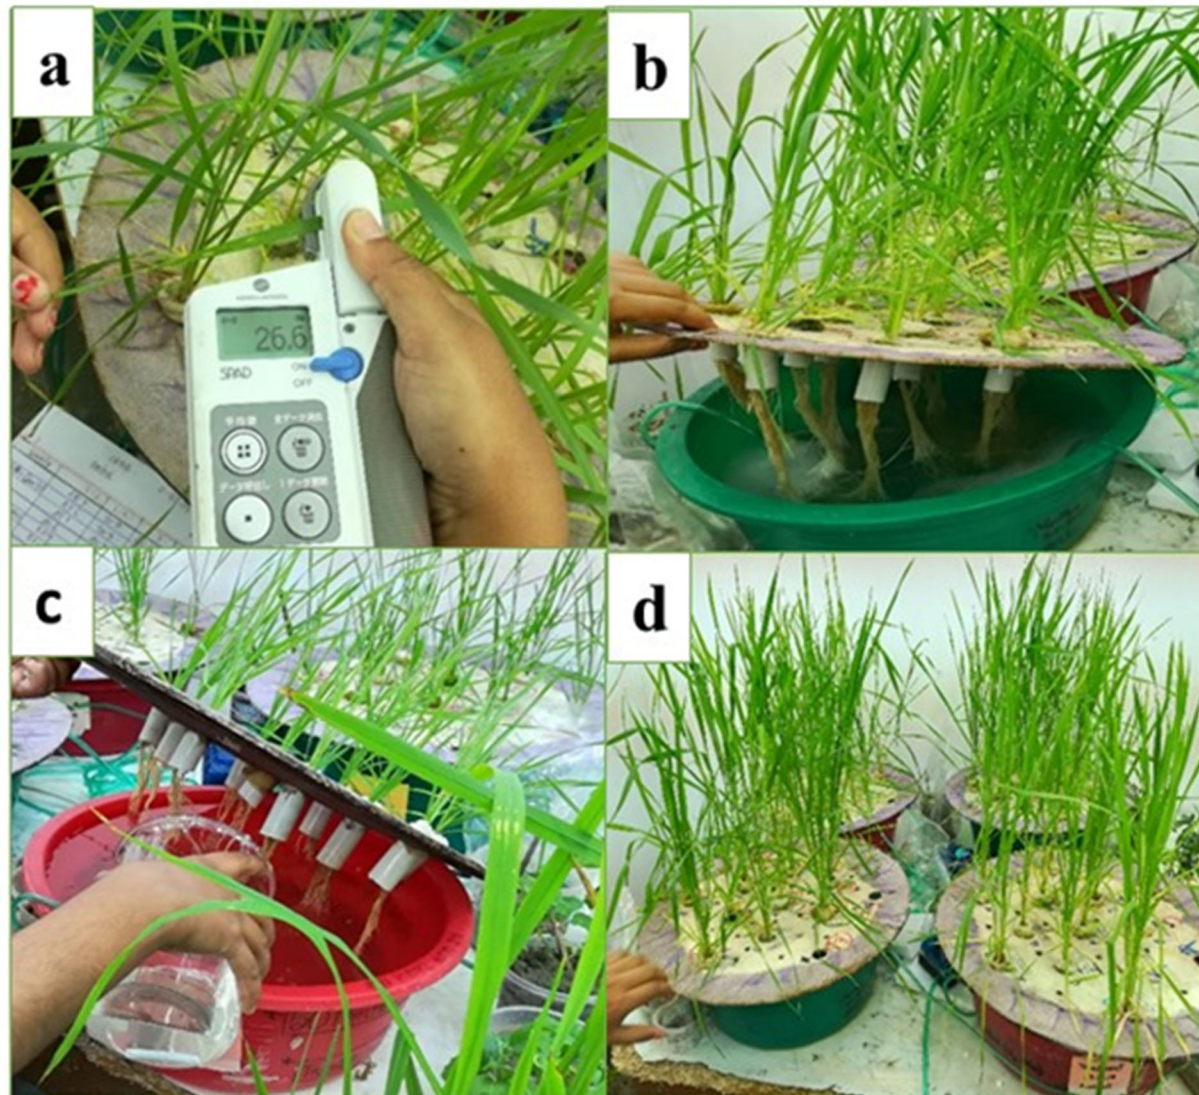

**Figure S1:** Culture of wheat genotypes in a plant culture room a) measurement of chlorophyll content b) root growth c) inspection of oxygen supply and adding of nutrients d) plants of twenty-two wheat genotypes before destructive harvest.
